# Supplementary material
Source: PubMed Central journal article supplement (PMC3184199)
Supplement: NIHMS314867-supplement-1.pdf [file NIHMS314867-supplement-1.pdf]

# Supplementary Information

## Germline *BAP1* mutations predispose to malignant mesothelioma

Joseph R. Testa,<sup>1\*</sup> Mitchell Cheung,<sup>1</sup> Jianming Pei,<sup>1</sup> Jennifer E. Below,<sup>2</sup> Yinfei Tan,<sup>1</sup>  
Eleonora Sementino,<sup>1</sup> Nancy J. Cox,<sup>2,3</sup> A. Umran Dogan,<sup>4,5</sup> Harvey I. Pass,<sup>6</sup> Sandra Trusa,<sup>6</sup>  
Mary Hesdorffer,<sup>7</sup> Masaki Nasu,<sup>8,9</sup> Amy Powers,<sup>8</sup> Zeyana Rivera,<sup>8,9</sup> Sabahattin  
Comertpay,<sup>8,9</sup> Mika Tanji,<sup>8,9</sup> Giovanni Gaudino,<sup>8</sup> Haining Yang<sup>8,10</sup> & Michele Carbone<sup>8\*</sup>

<sup>1</sup>Cancer Biology Program, Fox Chase Cancer Center, Philadelphia, PA, USA

<sup>2</sup>Department of Medicine, University of Chicago, Chicago, IL, USA

<sup>3</sup>Departments of Human Genetics, University of Chicago, Chicago, IL, USA

<sup>4</sup>Earth Sciences Department, KFUPM, Dhahran, Saudi Arabia

<sup>5</sup>Department of Chemical and Biochemical Engineering, University of Iowa, Iowa City, IA, USA

<sup>6</sup>New York University, Langone Medical Center and Cancer Center, New York, NY, USA

<sup>7</sup>Mesothelioma Applied Research Foundation, Alexandria, VA, USA

<sup>8</sup>University of Hawaii Cancer Center, University of Hawaii at Manoa, Honolulu, HI, USA

<sup>9</sup>Department of Molecular Biosciences and Bioengineering, University of Hawaii at Manoa, Honolulu, HI, USA

<sup>10</sup>Department of Pathology, John A. Burns School of Medicine, University of Hawaii at Manoa, Honolulu, HI, USA

Corresponding authors:

Dr. Joseph R. Testa, Cancer Biology Program, Fox Chase Cancer Center, Philadelphia, PA, 19111 USA

Tel: 1-215-728-2610; Fax: 1-215-214-1623; Email: [joseph.testa@fcc.edu](mailto:joseph.testa@fcc.edu)

Dr. Michele Carbone, University of Hawaii Cancer Center, University of Hawaii at Manoa, Honolulu, HI, 96813 USA

Tel: 1-808-586-3013; Fax: 1-808-586-3052; Email: [mcarbone@cc.hawaii.edu](mailto:mcarbone@cc.hawaii.edu)

**Supplementary Table 1.** Summary of the genetic and demographic data of the patients studied. L, Louisiana mesothelioma family; W, Wisconsin mesothelioma family; SP, sporadic mesotheliomas; MM, malignant mesothelioma. Mesotheliomas show variable histologies, the most common variants being epithelial (E), which represents ~65% of cases, sarcomatoid (10%) and biphasic (B), seen in ~25%; the latter show both epithelial and spindle cell morphologies. All familial mesotheliomas studied here were of the epithelial type; however, the significance of this finding could not be established due to the relatively small number of familial mesothelioma cases.

**Supplementary Table 2.** Primers used for the amplification of genomic DNA for sequencing. Shown are pairs of primers used to amplify various regions of the *BAP1* gene as well as the expected PCR product sizes.

**Supplementary Figure 1.** Joint familial mesothelioma linkage results for L and W families. Parametric multipoint LOD score (y axis), calculated in ALLEGRO assuming a high-penetrance autosomal dominant model with low disease susceptibility allele frequency (see Online Methods), is plotted against chromosomal location (x axis), with vertical dotted lines separating the individual chromosomes. Linkage analyses conducted assuming that only those with mesothelioma were affected did yield other regions with similar evidence for linkage in both the W and L families. Exome sequencing (conducted in parallel, and completed after the *BAP1* mutations had been identified by conventional Sanger sequencing) verified the *BAP1* mutations and allowed us to rule out the possibility that missense or nonsense variants in genes mapping to other regions contributed to risk of mesothelioma in the W and L families.

**Supplementary Figure 2.** DNA analysis of two mesothelioma families and splicing assay of mutation in family W. (a) Electropherogram depicting heterozygous germline *BAP1* splice site

mutation in family W. (b) Mini-gene expression construct used for splicing assay (*upper left*). RT-PCR revealed two *BAP1* bands in 293T cells transfected with wild-type construct but only the smaller band with mutant construct (*upper right*). Sequencing revealed that the larger band contained correctly spliced exons 6-8, while smaller band contained only exons 6 and 8 (*bottom*). (c) Electropherogram of 25-bp deletion within exon 4 of *BAP1* of tumor W-III-04T. Deletion results in frameshift and premature termination of BAP1. (d) Electropherogram depicting *BAP1* nonsense mutation (g. chr3:52,436,624 C>T) observed in germline DNA of affected family L members. Resulting CAG>TAG stop codon causes premature truncation leading to loss of BAP1 nuclear localization signal. In family L, *BAP1* mutations were not detected in two individuals with prostate cancer.

**Supplementary Figure 3.** Asbestos in family W home. (a) SEM images of exfoliated vermiculite mineral used in attic insulation in the house, and (b) SEM images of amphibole asbestos (tremolite or winchite with small amounts of richterite) found within "sheets" of the vermiculite layers. "Zonolite" was the commercial name of this product. We found some chrysotile asbestos in the basement of the house as insulation (wrappings), but it was not deteriorated and, thus, an unlikely source of exposure. Abbreviations: see Online Methods.

**Supplementary Figure 4.** Asbestos in one of the L family homes. (a) SEM image of bulk sample showing asbestos fibers (chrysotile); (b) powder XRD spectra of bulk sample showing chrysotile type asbestos, with spectra matching that of JCPDF standard number 00-25-0645 chrysotile; (c) electron diffraction pattern of typical chrysotile; and (d) energy dispersive spectra of Mg and Si, indicating chrysotile type asbestos. Thus, SEM and powder XRD of bulk samples, and TEM, EDS and ED for individual asbestos fibers, positively identified chrysotile asbestos. Abbreviations: see Online Methods.

**Supplementary Figure 5.** Expression analysis of BAP1 in mesothelioma (MM) cell lines and effect of re-expression of BAP1 on clonogenic growth. (a) Immunoblot analysis demonstrating loss of detectable BAP1 expression in 4/9 cell lines shown here (7/12 lines tested overall). LP9, hTERT-immortalized normal mesothelial cells, were used as a control. GAPDH, loading control. (b) Re-expression of BAP1 in two mesothelioma cell lines lacking detectable endogenous expression of BAP1 resulted in decreased colony-forming ability.

**Supplementary Figure 6.** Zoomed-in image of array-CGH analysis profiles of tumors L-III-18T and W-III-06T. Red profile shows a focal ~218-kb homozygous deletion encompassing *BAP1* within a larger 3p deletion (tumor L-III-18T); blue profile shows the start of an amplicon immediately proximal to *BAP1* (tumor W-III-06T). Expanded diagram at *right* depicts  $\log_2$  ratios of two probes within the *BAP1* locus (chr3:52,435,027-52,444,009), i.e., A\_16\_P00704764 (chr3:52438014-52438066) and A\_14\_P128339 (chr3:52443209-52443268) in tumor W-III-06T. The  $\log_2$  ratios for these two *BAP1* probes were -0.03 and -0.28, respectively, whereas the nearest two centromeric probes, A\_16\_P16224907 (chr3:52448321-52448380) and A\_14\_P200097 (chr3:52452536-52452595), located within the *PHF7* gene, showed  $\log_2$  ratios of 1.08 and 0.91, respectively, indicative of a transition to the higher copy number of the amplicon. Expanded view at *left* depicts  $\log_2$  ratios (-0.89, -1.18, -1.60 and -1.21, respectively) of same probes in tumor L-III-18T. Region shown represents a portion of a homozygous deletion in 3p21.1 encompassing *BAP1*, *PHF7*, and several other genes (*DNAH1*, *SEMA3G*, *TNNC1*, *NISCH*, *STAB1*, *NT5DC2*, and *PBRM1* – not shown). pter, distal end of short arm of chromosome 3; cen, centromere.

**Supplementary Table 1 Summary of genetic and demographic data of cases in this study**

| Sample ID | Age <sup>a</sup> | Gender | MM  | MM Histology | Uveal Melanoma | Other Cancers                                    | Germline <i>BAP1</i> Mutation                      | Mutations Identified in Mesothelioma Specimens                                              |
|-----------|------------------|--------|-----|--------------|----------------|--------------------------------------------------|----------------------------------------------------|---------------------------------------------------------------------------------------------|
| L-II-05   | 82a              | F      | No  |              | No             | Squamous cell ca. (skin)                         | Exon 16 (52,436,624 C>T-nonsense)                  |                                                                                             |
| L-II-12   | 68a              | F      | No  |              | No             | Basal cell ca.                                   | Exon 16 (52,436,624 C>T-nonsense)                  |                                                                                             |
| L-II-18   | 54d              | F      | No  |              | Yes            | Metastasis to liver                              | (no DNA available)                                 |                                                                                             |
| L-II-09   | 65d              | F      | Yes | N.A.         | None           | None                                             | (no DNA available)                                 |                                                                                             |
| L-II-14   | 57d              | M      | Yes | N.A.         | No             | None                                             | Exon 16 (52,436,624 C>T-nonsense) <sup>b</sup>     |                                                                                             |
| L-II-03   | 73d              | F      | No  |              | No             | Pancreatic ca.                                   | Exon 16 (52,436,624 C>T-nonsense) <sup>b</sup>     |                                                                                             |
| L-II-07   | 70d              | F      | Yes | N.A.         | No             | None                                             | Exon 16 (52,436,624 C>T-nonsense) <sup>b</sup>     |                                                                                             |
| L-III-18  | 59               | F      | Yes | E            | Yes            | None                                             | Exon 16 (52,436,624 C>T-nonsense)                  | Exon 16 (52,436,624 C>T-nonsense) <sup>c</sup>                                              |
| L-III-22  | 63               | F      | Yes | E            | No             | None                                             | Exon 16 (52,436,624 C>T-nonsense)                  | N.D.                                                                                        |
| L-III-31  | 50               | M      | Yes | E            | No             | None                                             | Exon 16 (52,436,624 C>T-nonsense)                  | N.D.                                                                                        |
| L-II-02   | 86a              | M      | No  |              | No             | Prostate ca.                                     | None                                               |                                                                                             |
| L-III-15  | 81a              | F      | Yes | N.A.         | No             | None                                             | Exon 16 (52,436,624 C>T-nonsense) <sup>b</sup>     |                                                                                             |
| L-III-20  | 59               | M      | No  |              | No             | Prostate ca                                      | None                                               |                                                                                             |
| W-III-04  | 58               | M      | Yes | E            | No             | None                                             | Intron 6 (52,441,334 A>G-splice site)              | Intron 6 (52,441,334 A>G-splice site); Exon 4 (52,442,507-531 ATTGATGATGATATGTGAATAACA del) |
| W-III-06  | 50               | F      | Yes | E            | No             | None                                             | Intron 6 (52,441,334 A>G-splice site)              | Intron 6 (52,441,334 A>G-splice site) <sup>d</sup>                                          |
| W-III-08  | 58               | F      | Yes | E            | No             | None                                             | Intron 6 (52,441,334 A>G-splice site)              | Intron 6 (52,441,334 A>G-splice site) <sup>e</sup>                                          |
| W-IV-21   | 44               | F      | Yes | E            | No             | None                                             | Intron 6 (52,441,334 A>G-splice site)              | N.D.                                                                                        |
| W-IV-17   | 37               | F      | No  |              | No             | Breast ca.                                       | Intron 6 (52,441,334 A>G-splice site)              |                                                                                             |
| W-III-09  | 57               | F      | No  |              | No             | Clear cell renal cell ca.                        | Intron 6 (52,441,334 A>G-splice site)              |                                                                                             |
| W-II-01   | 92d              | M      | No  |              | No             | None                                             | None                                               |                                                                                             |
| W-II-02   | 36               | F      | Yes | N.A.         | No             | None                                             | Intron 6 (52,441,334 A>G-splice site) <sup>b</sup> |                                                                                             |
| W-III-01  | 57a              | M      | No  |              | No             | None                                             | None                                               |                                                                                             |
| W-III-03  | 59a              | F      | No  |              | No             | None                                             | None                                               |                                                                                             |
| W-III-10  | 59               | F      | No  |              | No             | Ovarian ca.                                      | Intron 6 (52,441,334 A>G-splice site) <sup>b</sup> |                                                                                             |
| SP-002    | 55               | F      | Yes | E            | Yes            | Leiomyosarcoma                                   | Exon 13 (52,437,444 C del)                         | N.D.                                                                                        |
| SP-008    | 63               | M      | Yes | E            | Yes            | None                                             | Exon 14 (52,437,159-162 TCAC del)                  | N.D.                                                                                        |
| SP-007    | 55               | F      | Yes | E            | No             | Basal cell ca.                                   | None                                               | N.D.                                                                                        |
| SP-011    | 63               | M      | Yes | B            | No             | Basal cell ca.                                   | None                                               | None                                                                                        |
| SP-015    | 82               | M      | Yes | E            | No             | Basal cell ca.                                   | None                                               | Exon 9 (52,440,352 G del)<br>Exon 13 (52,437,664 C del)                                     |
| SP-026    | 66               | M      | Yes | B            | No             | Basal cell ca.                                   | None                                               | None                                                                                        |
| SP-020    | 75               | M      | Yes | E            | No             | Basal cell ca.; Meningioma                       | None                                               | None                                                                                        |
| SP-025    | 52               | M      | Yes | E            | No             | Basal cell ca.; Squamous cell ca. (skin)         | None                                               | None                                                                                        |
| SP-005    | 34               | F      | Yes | E            | No             | Breast ca.; Leiomyosarcoma                       | None                                               | N.D.                                                                                        |
| SP-010    | 69               | F      | Yes | E            | No             | Breast ca.; Bronchioalveolar ca.; Pancreatic ca. | None                                               | N.D.                                                                                        |
| SP-019    | 71               | M      | Yes | B            | No             | Colon ca.                                        | None                                               | None                                                                                        |
| SP-016    | 74               | M      | Yes | E            | No             | Colon ca.; Prostate ca.                          | None                                               | None                                                                                        |
| SP-004    | 62               | F      | Yes | B            | No             | Hairy cell leukemia                              | None                                               | N.D.                                                                                        |
| SP-003    | 64               | M      | Yes | E            | No             | Melanoma (skin)                                  | None                                               | N.D.                                                                                        |
| SP-017    | 74               | M      | Yes | E            | No             | Melanoma (skin)                                  | None                                               | None                                                                                        |
| SP-018    | 70               | M      | Yes | E            | No             | Prostate ca.                                     | None                                               | Exon 17 (52,436,398-399 CG del)                                                             |
| SP-013    | 70               | M      | Yes | B            | No             | Prostate ca.                                     | None                                               | Exon 16 (52,436,599-627 GCTCAGGAAGGTGAGGGATCGCTGCTG del)                                    |
| SP-021    | 61               | M      | Yes | E            | No             | Prostate ca.                                     | None                                               | None                                                                                        |
| SP-012    | 58               | F      | Yes | E            | No             | Squamous cell ca. (skin)                         | None                                               | None                                                                                        |
| SP-001    | 63               | M      | Yes | E            | No             | None                                             | None                                               | Exon 11 (52,439,219 C del)                                                                  |
| SP-006    | 60               | M      | Yes | E            | No             | None                                             | None                                               | N.D.                                                                                        |
| SP-009    | 55               | M      | Yes | E            | No             | None                                             | None                                               | None                                                                                        |
| SP-014    | 60               | M      | Yes | E            | No             | None                                             | None                                               | None                                                                                        |
| SP-022    | 56               | M      | Yes | E            | No             | None                                             | None                                               | None                                                                                        |
| SP-023    | 53               | F      | Yes | B            | No             | None                                             | None                                               | None                                                                                        |
| SP-024    | 78               | M      | Yes | B            | No             | None                                             | None                                               | None                                                                                        |

MM, malignant mesothelioma; ca., carcinoma; N.A., not available; N.D., not determined; E, epithelial MM histology; del, deletion; B, biphasic MM histology.

<sup>a</sup> Age at diagnosis. When this information was not available, either current age of patient who is still alive (e.g., 82a) or age at death (e.g., 92d) are indicated.

<sup>b</sup> Presence of mutation inferred based on the results of linkage analysis; all others were determined by DNA sequencing.

<sup>c</sup> An aCGH analysis revealed a focal homozygous deletion (~218 kb in size) encompassing the entire *BAP1* locus, indicating that at least a subset of tumor cells have loss of both mutant and wild-type *BAP1* alleles.

<sup>d</sup> aCGH analysis showed amplicon within 4 kb of *BAP1* locus.

<sup>e</sup> DNA sequencing revealed absence of wild-type *BAP1* allele

**Supplementary Table 2 Primers used for the amplification of genomic DNA for sequencing**

| Primer Pairs             | Primer Sequences                                              | PCR Product Size (bp) |
|--------------------------|---------------------------------------------------------------|-----------------------|
| BAP1-2F<br>BAP1-2R       | GTGGGTCACGCGGACTATGACCTTC<br>CTCCGCCTCTGGGCTCGTCTTC           | 591                   |
| BAP1-3F<br>BAP1-3R       | CTCTCCCTTCGCCCCGCTCGT<br>AGTAGGGAAGGACAGCCCCTGATGAGT          | 630                   |
| BAP1-4F<br>BAP1-4R       | CTGGAGAGCGACCCAGGTGAGGAG<br>AAAAGACATTGTGTGACCGGGGTCTTC       | 599                   |
| BAP1-5F<br>BAP1-5R       | CTCTGAGTGCCCGCTCCTGATCAAAC<br>TCCAGGAGTCCACCCAGTCTCCTTATG     | 586                   |
| BAP1-6F<br>BAP1-6R       | GTGGGTGTTTCATTTGCTTTCTGACTG<br>CAAACAAAGCACAGAGTCCAGCAGACC    | 579                   |
| BAP1-7F<br>BAP1-7R       | CCCTTACTTCCCCAGCCCTGTATATG<br>AGGCATGAGTTGCACAAGAGTTGGGTA     | 576                   |
| BAP1-8F<br>BAP1-8R       | TCCAGTGGGTATTTGGTAGGTGCTTGT<br>GACACTAGGAAGCAACATGGCCTGAGA    | 592                   |
| BAP1-9F<br>BAP1-9R       | GCCACTGGGAATGCTACCACATGATATT<br>GGCCTGTGATAGGCACATAGCTGACAA   | 681                   |
| BAP1-10F<br>BAP1-10R     | GGGGTGGGAGTAGGGGGAGTATCATT<br>CAGAGAGTAGAACAGGGCAGGCACAGG     | 578                   |
| BAP1-11F<br>BAP1-11R     | GCTCTTCTGTCTTCTTCCCCTCC<br>CCGCCATCAGGTTGAGGCAGATA            | 572                   |
| BAP1-12F<br>BAP1-12R     | TTCCAGATAGGCCCTCATAACAGCTTG<br>GGCTCTACCCATTCACTCACAGGGAAA    | 574                   |
| BAP1-13F<br>BAP1-13R     | TTCCCCACAGCATTGTCTCTGATTC<br>GGGAAGGACTGCTCTCCCTCTACCTTC      | 578                   |
| BAP1-14F<br>BAP1-14R     | CCTCTGAGGGCAACCACACAGGTACT<br>GCTTCACCACTAGCTTGGGTTTGTGG      | 572                   |
| BAP1-15F<br>BAP1-15R     | TTCTTCTCTGGGAAGTGCTGGTTCACA<br>GCCCTGAAACACATGCCTTTATTTTGC    | 595                   |
| BAP1-16F<br>BAP1-16R     | TGGGTTGCTAGGTTCTCTGCCTGATA<br>CAGGATGGGATCCGAAGCACCTAGA       | 588                   |
| BAP1-17F<br>BAP1-17R     | TCTTTGTCCCAGGAGGAAGAAGACCTG<br>GGTCCAAGCAACTTGAAGTAGCCATGC    | 584                   |
| BAP1-18F<br>BAP1-18R     | AGGGATGGAGGAGATGTGGGTGGT<br>AGCGCAGTGGCGAGTTGAAAGC            | 568                   |
| BAP1-1819F<br>BAP1-1819R | CCCAGAAGGACCTCTCAATTCCTCTGTC<br>GCTTCCACGACCTCCTTCTCCACTG     | 571                   |
| BAP1-19F<br>BAP1-19R     | GGAGGAGGGAAGTGGCCAAGTGAC<br>GCCAGATCAGGCAACTGGAGAAATCAC       | 624                   |
| BAP1-20F<br>BAP1-20R     | TCATCCTTGCCCTAGCTGCCTATTGC<br>GCCTTGTAGGGGCGAGAGCGTTT         | 656                   |
| BAP1-21F<br>BAP1-21R     | CCTCTCCTGAGGCTTGAGCAGACCTT<br>ATGATACAAGGACCTGGGCCACCA        | 676                   |
| BAP1-22F<br>BAP1-22R     | GAGTTGGGGCACAGCGAGGTACTG<br>TGGTAATACTGAGGGGCTGGACAGAGG       | 658                   |
| BAP1-23F<br>BAP1-23R     | TGTTCTAGCCAGGCTGTTCAAGACTGC<br>CACAGGAGGGTTTCATTTCTCAGGAGATTC | 583                   |
| BAP1-24F<br>BAP1-24R     | ATGGCTTTGAAAAAGGTGATCCAAGCA<br>AGTGCACCCTGTCTACAGTCCACCTGA    | 381                   |

Abbreviations: F, forward; R, reverse; bp, base pairs

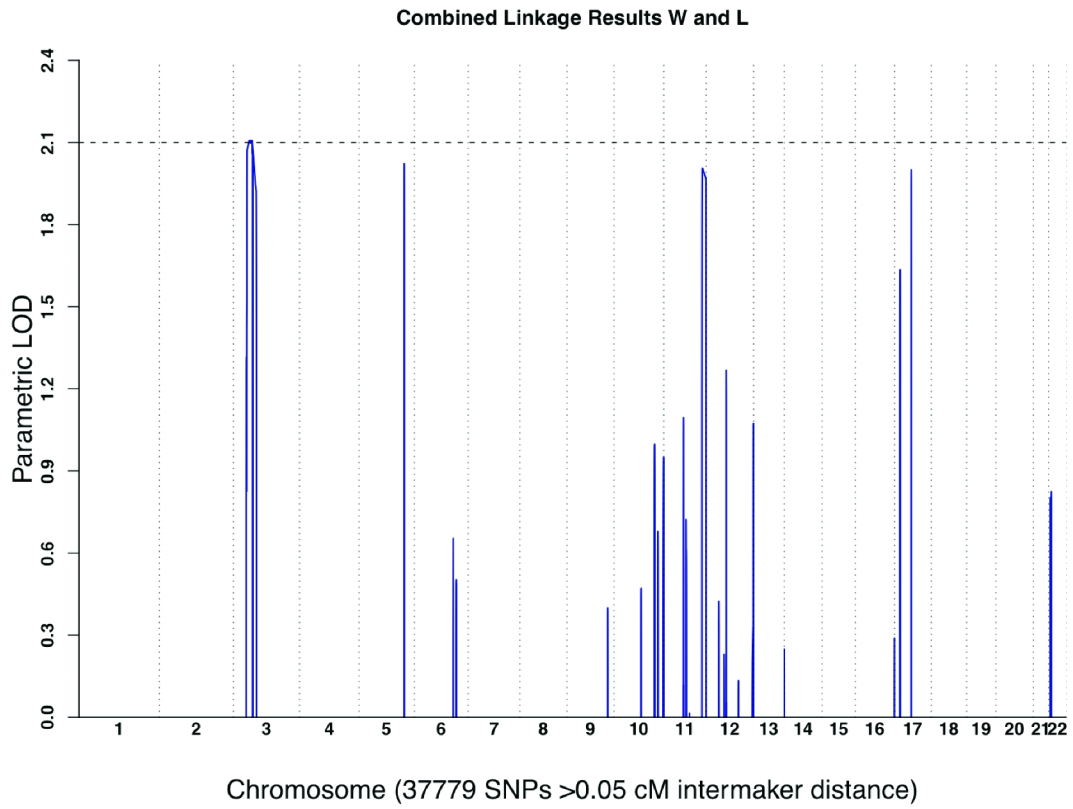

**Supplementary Figure 1**

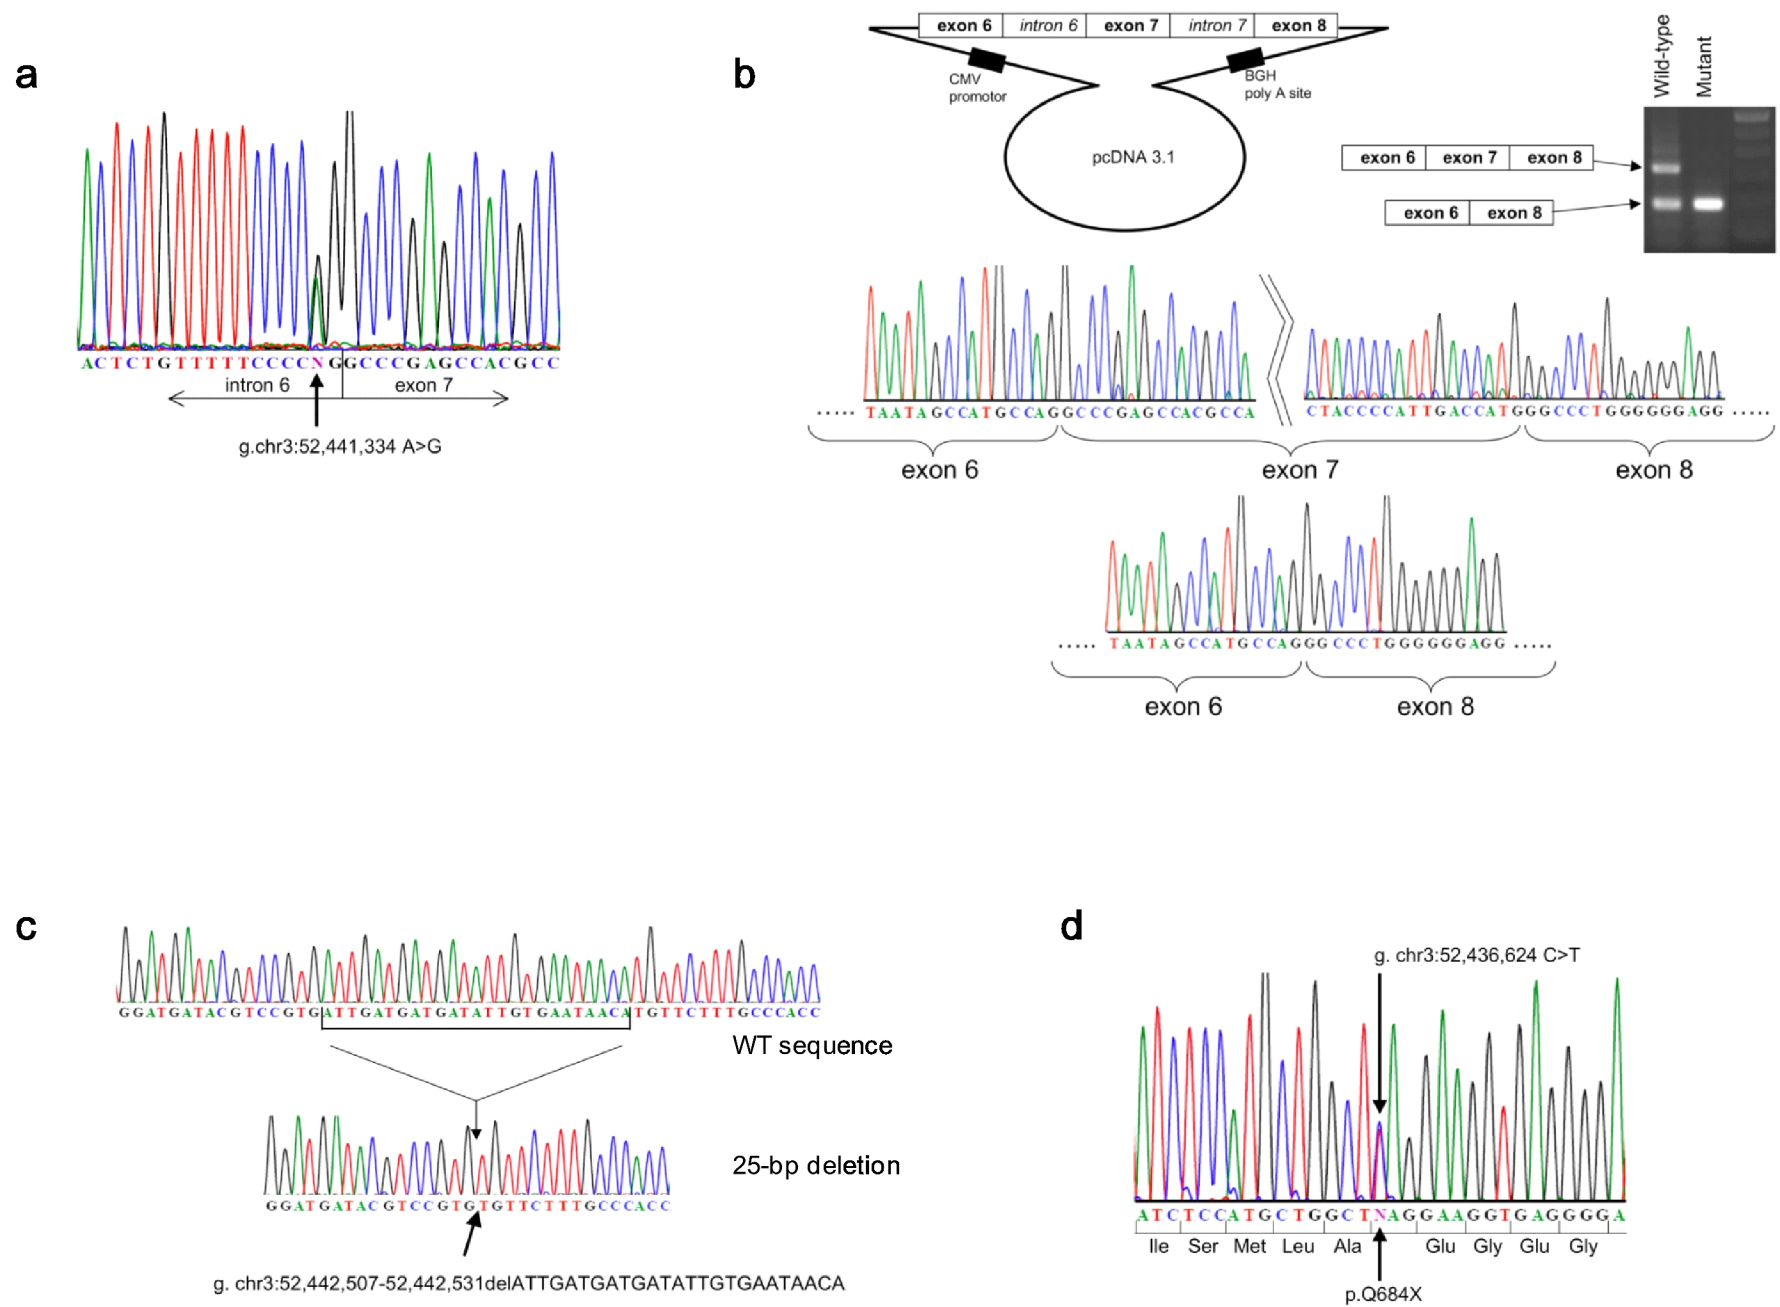

Supplementary Figure 2



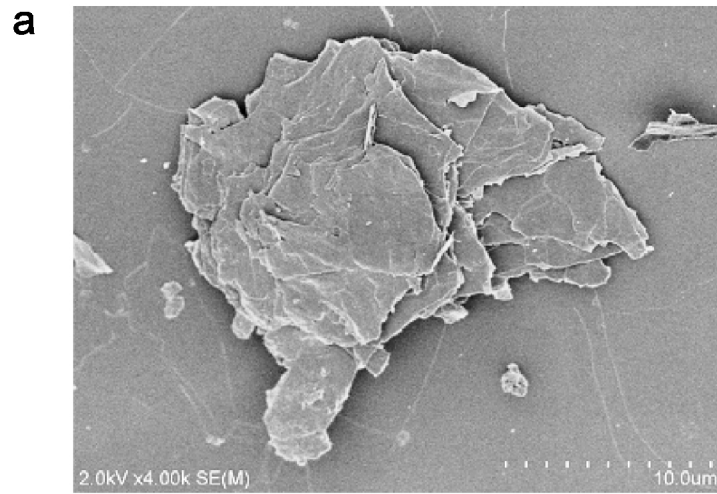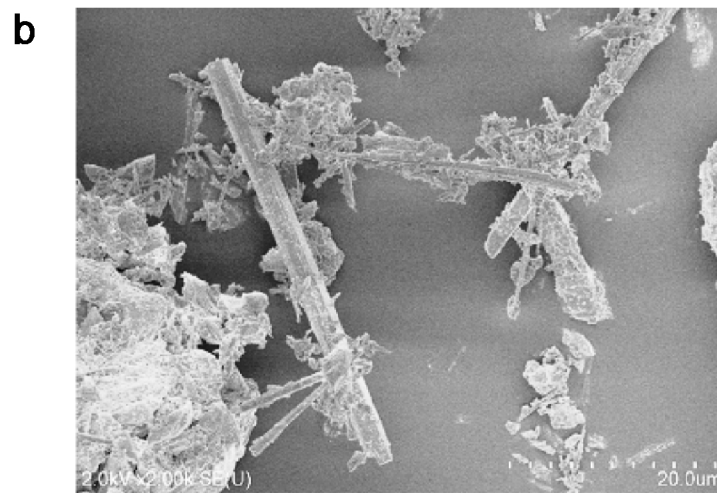

**Supplementary Figure 3**

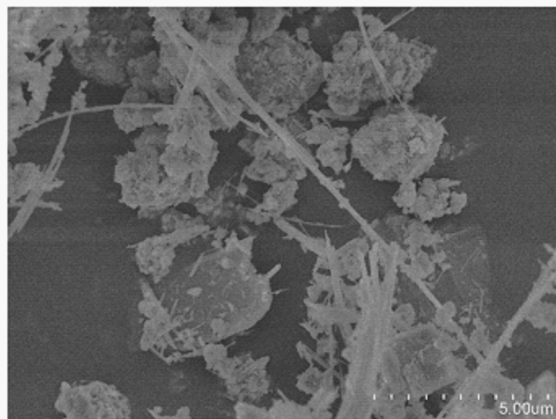

**a**

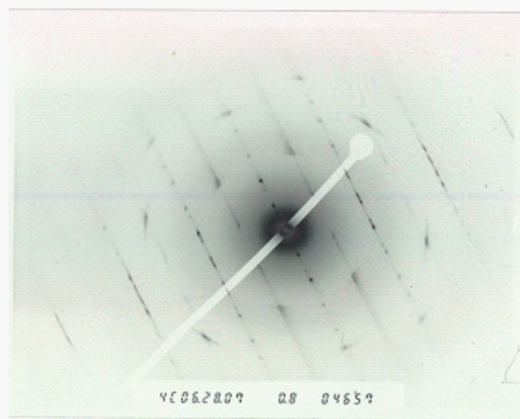

**c**

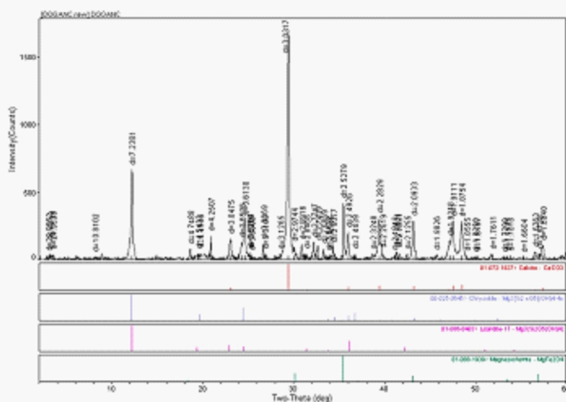

**b**

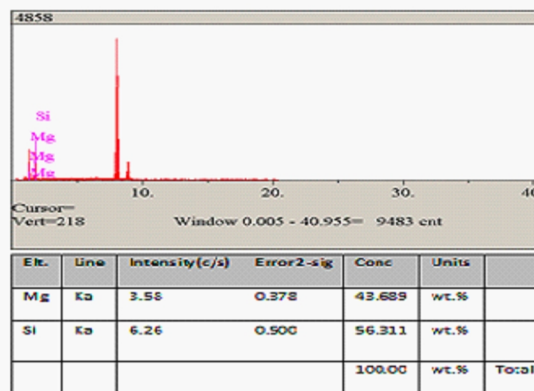

**d**

Supplementary Figure 4

**a**

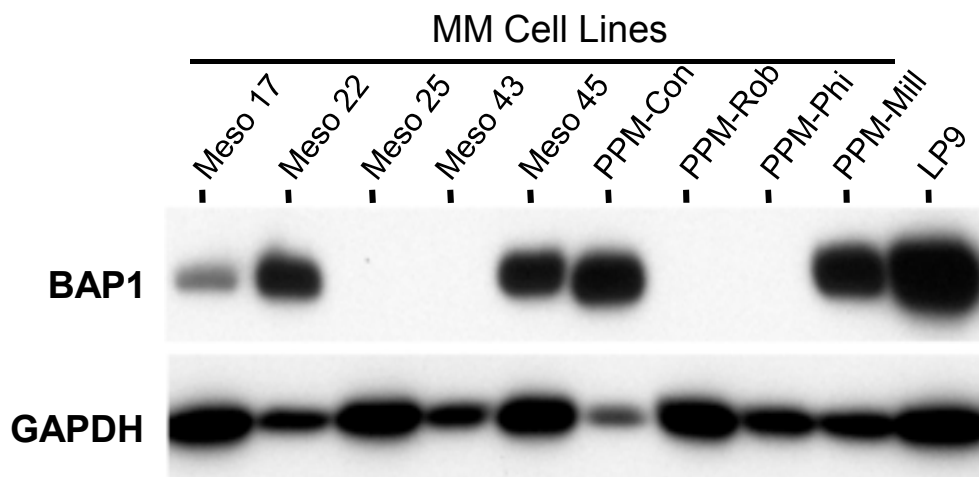

**b**

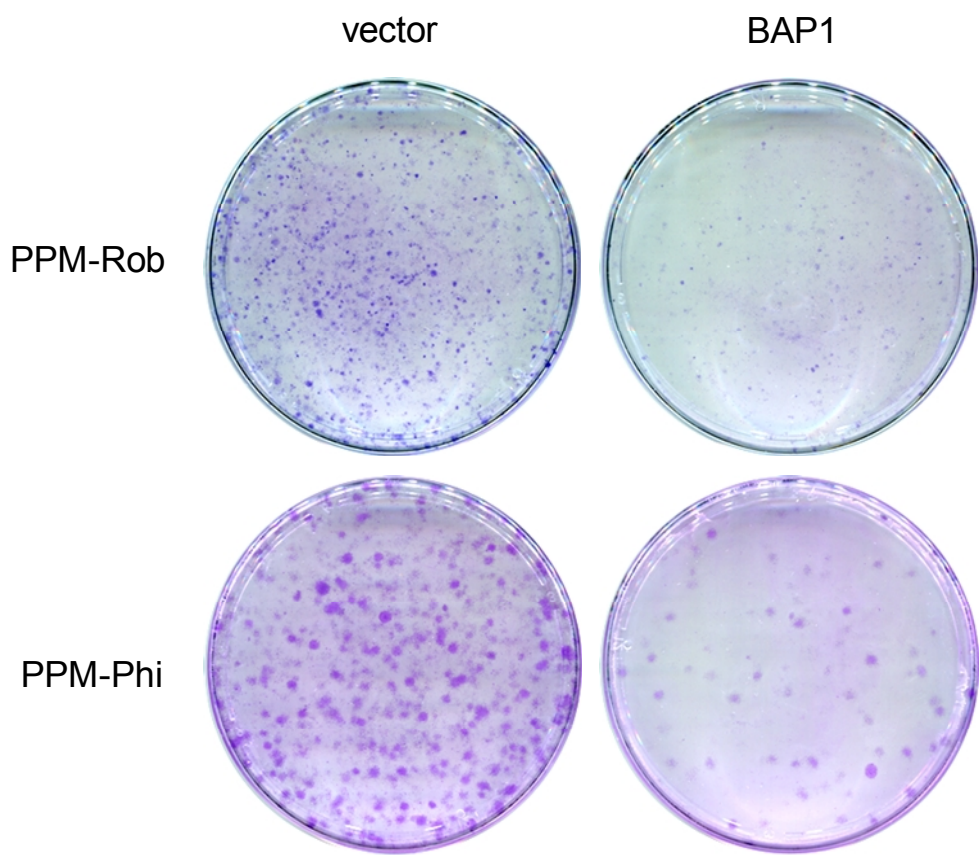

**Supplementary Figure 5**

Log<sub>2</sub> Ratio

-1 0

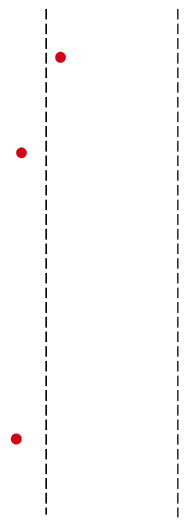

L-III-18T

pter  
↑

Log<sub>2</sub> Ratio

-2 -1 0 +1

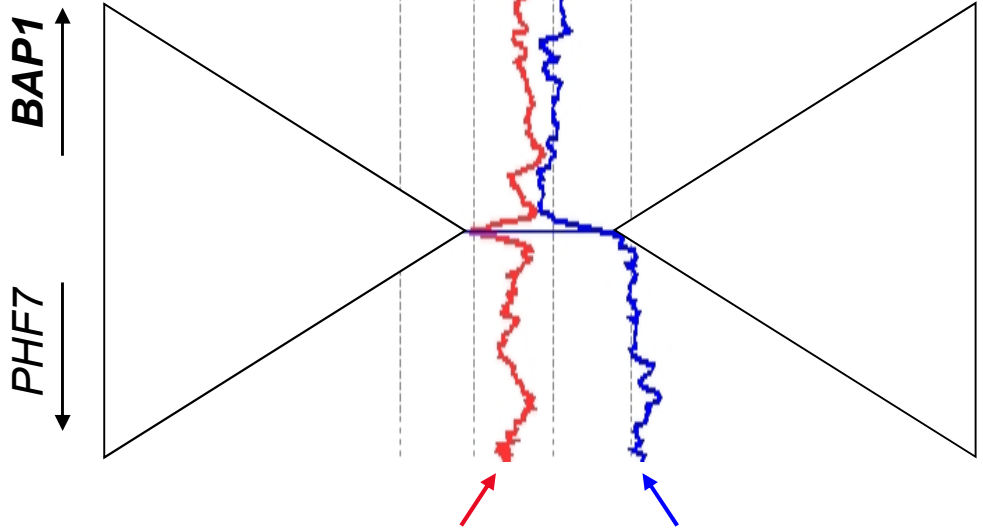

L-III-18T

W-III-06T

Log<sub>2</sub> Ratio

0 +1

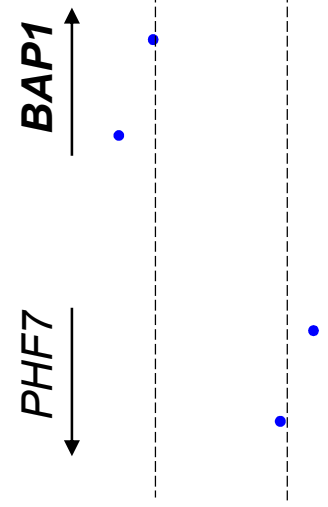

W-III-06T

cen  
↓

Supplementary Figure 6
